# Supplementary material for: Aluminium(III) hydration in aqueous solution. A Raman spectroscopic investigation and an ab initio molecular orbital study of aluminium(III) water clusters
Source: Royal Society of Chemistry journal article supplement (doi:10.1039/b003764h), 2000-01-01
Supplement: figures.doc [file figures.doc]

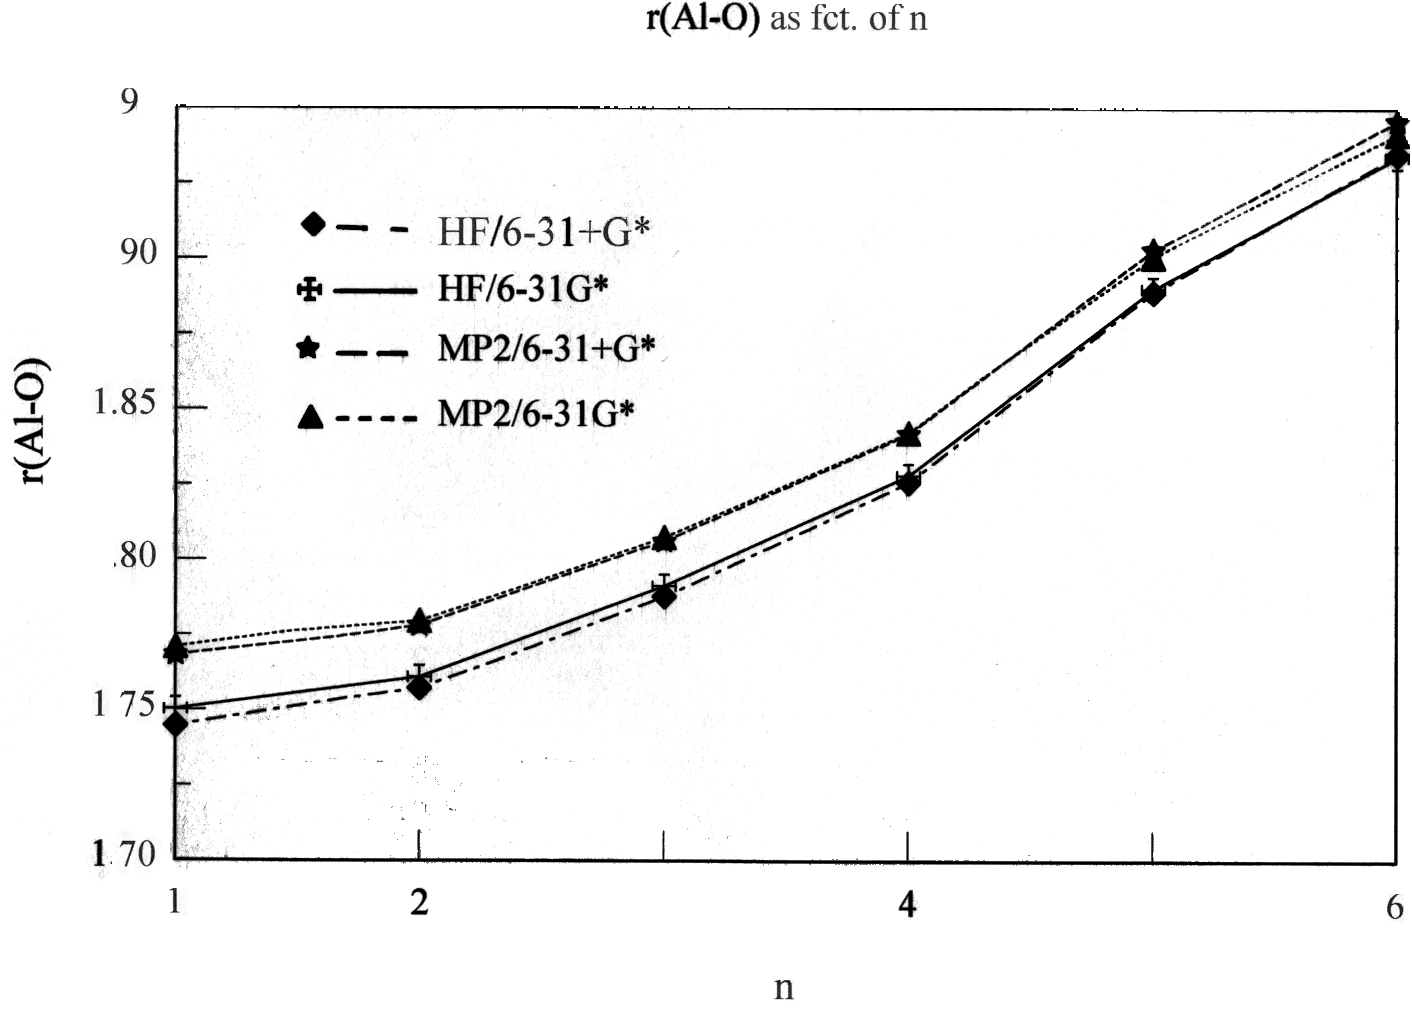


1S) The Al-O bond length, r(Al-O) as a function of the coordination number n for the Al3+(OH2)n cluster (at HF/6-31G*, HF/6-31+G*, MP2/6-31G* and MP2/6-31+G* levels of theory/basis set).


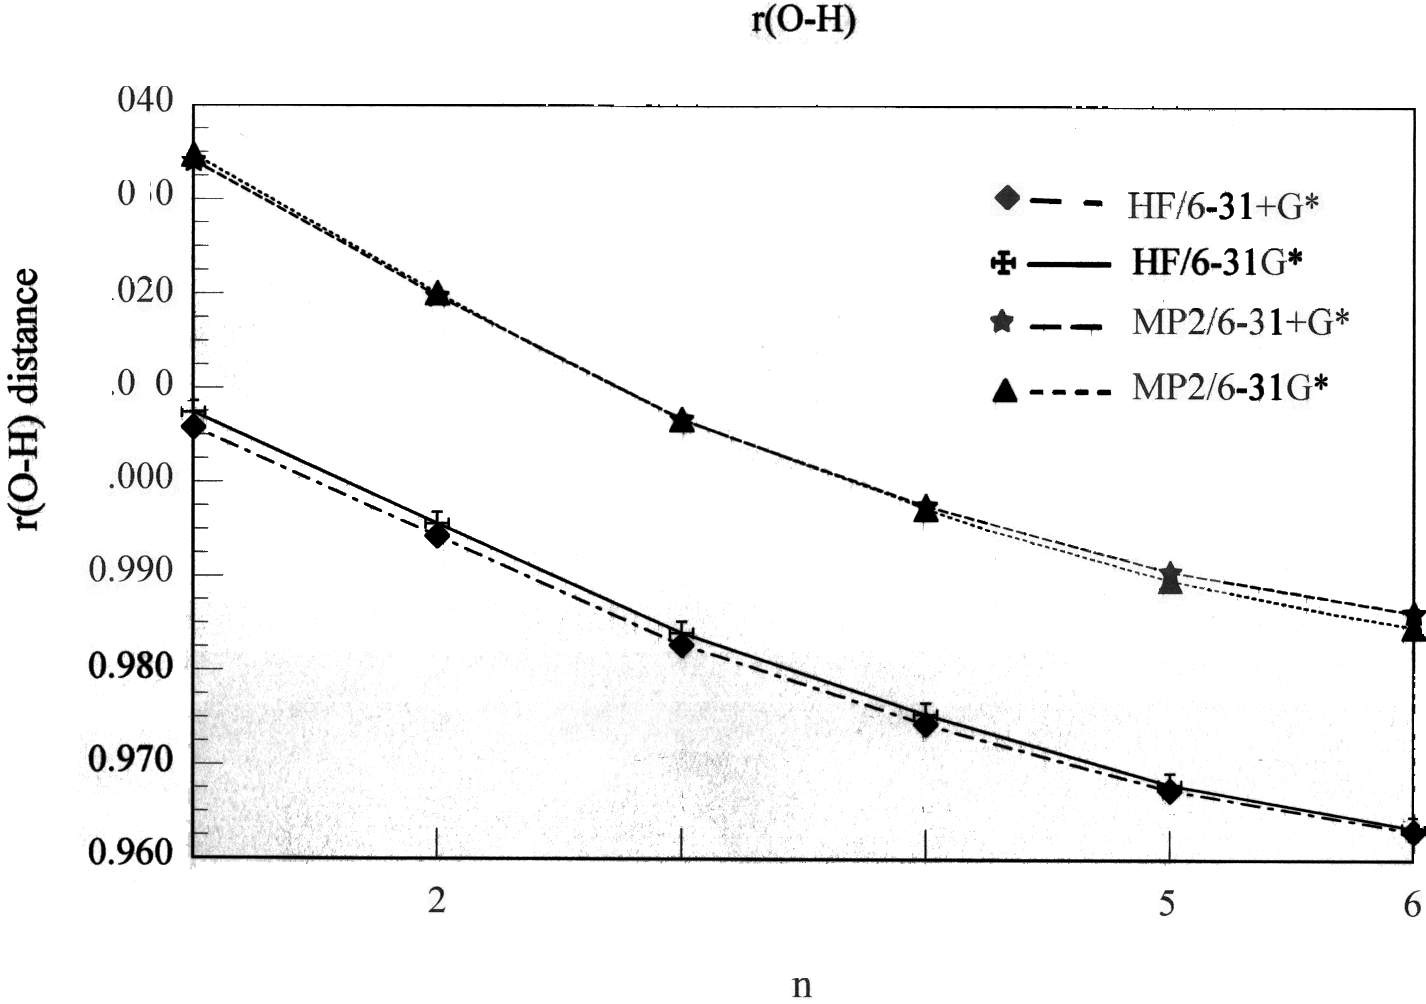


2S) The O-H bond length, r(O-H) of the first-sphere waters as a function of the coordination number n for the Al3+(OH2)n cluster (at HF/6-31G*, HF/6-31+G*, MP2/6-31G* and MP2/6- 31+G* levels of theory/basis set).


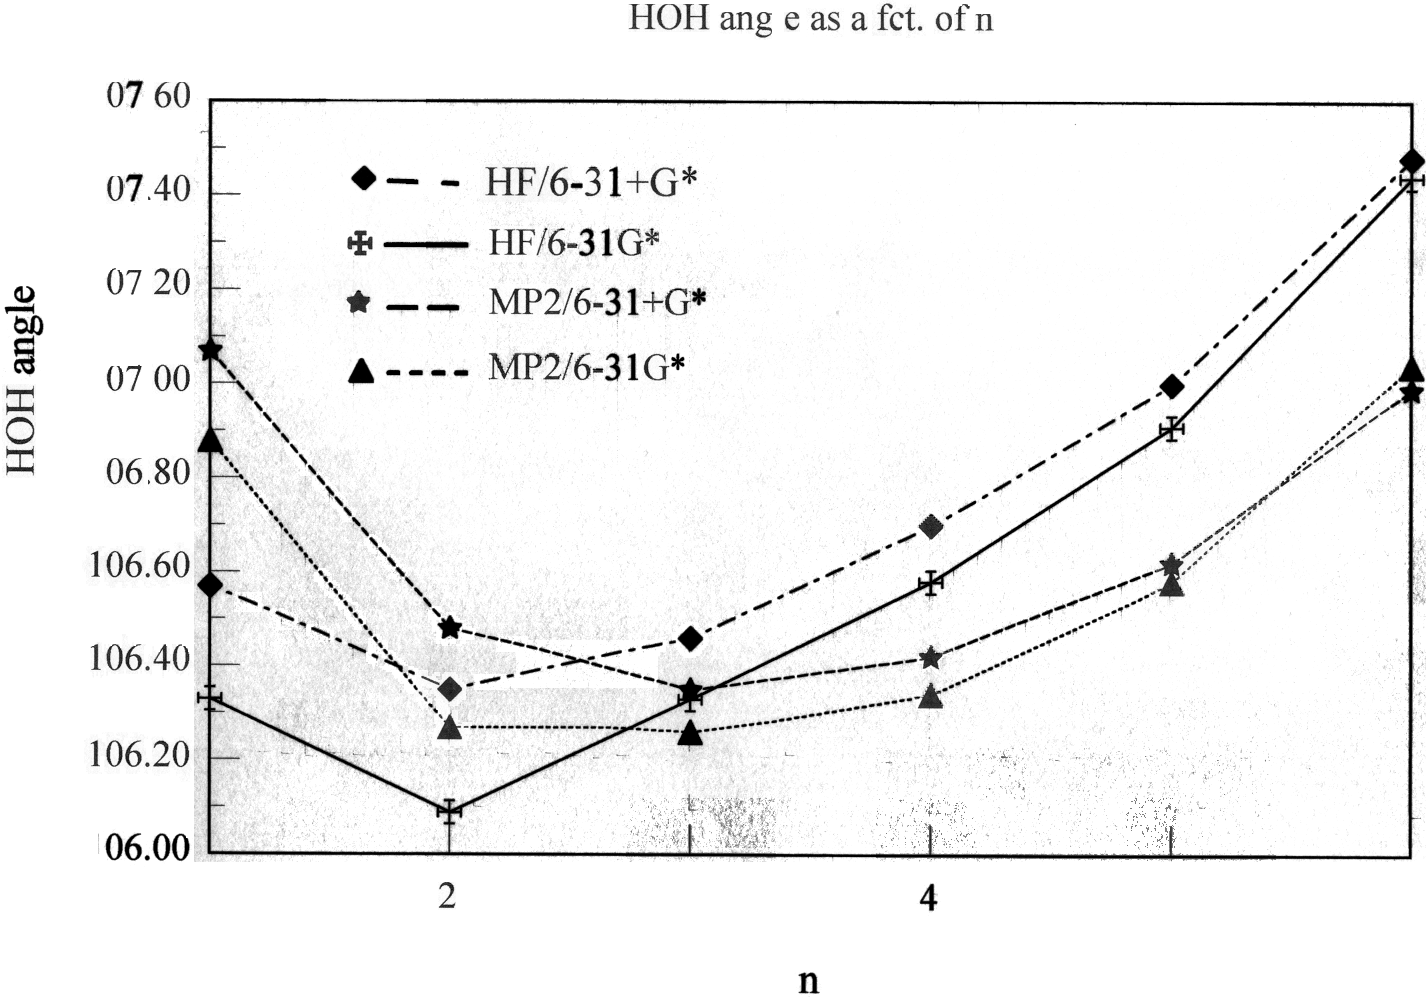


3S) The H-O-H angle of the first-sphere waters in aluminium(III) - water clusters as a function of the coordination number n (at HF/6-31G*, HF/6-31+G*, MP2/6-31G* and MP2/6-31+G* levels of theory/basis set).


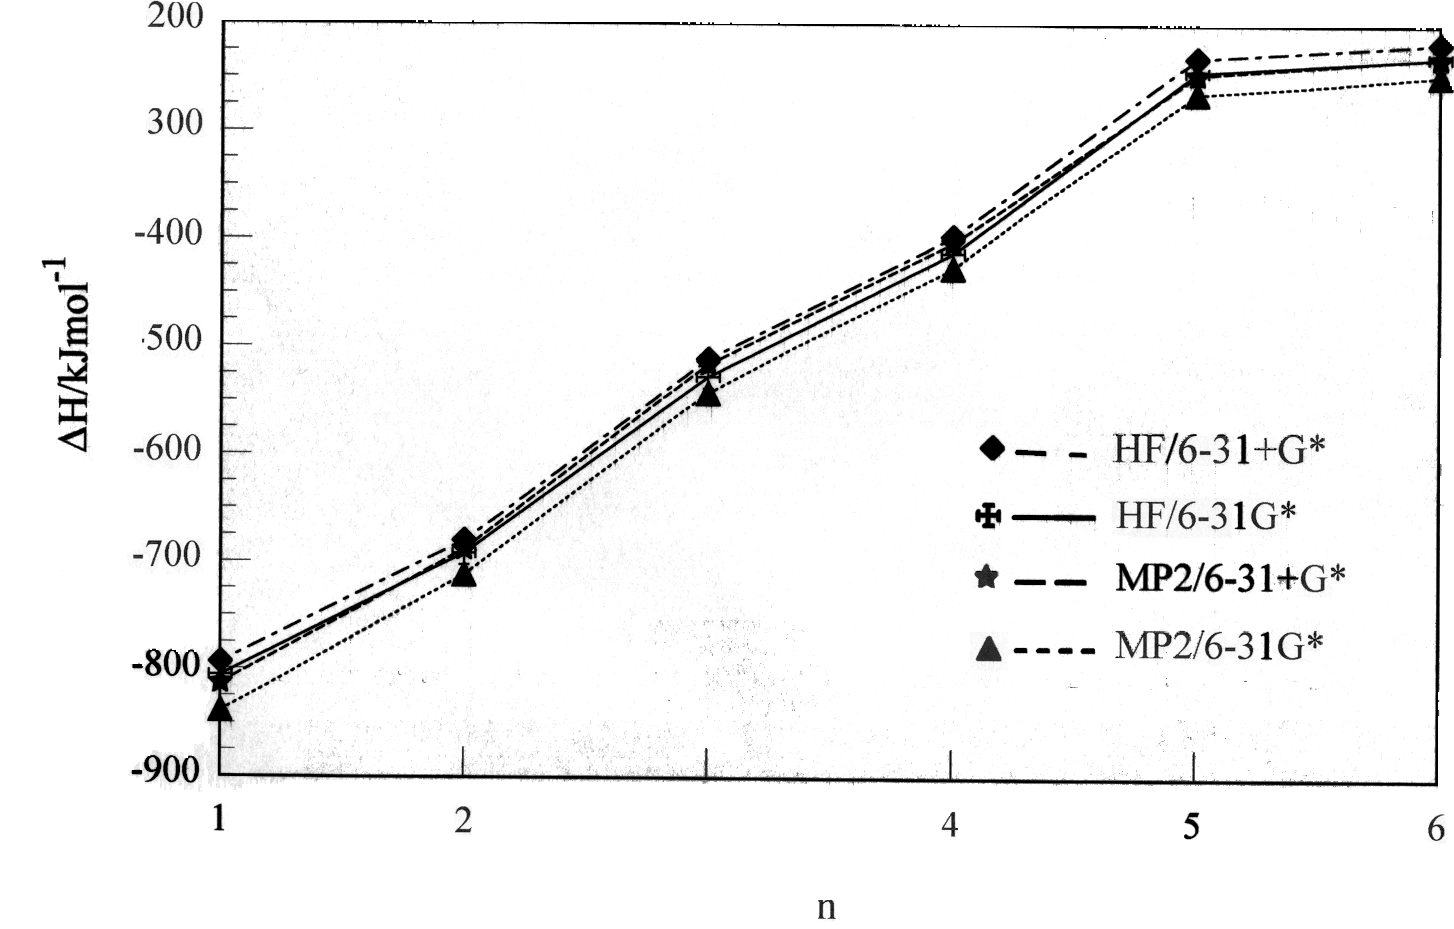


4S) The incremental binding enthalpy (in kJ/mol) as a function of the coordination number, n of the Al3+(OH2)n inner-sphere clusters (at HF/6-31G*, HF/6-31+G*, MP2/6-31G* and MP2/6- 31+G* levels of theory/basis set).
